# Supplementary material
Source: PubMed Central journal article supplement (PMC2812618)
Supplement: NIHMS149204-supplement-01.pdf [file NIHMS149204-supplement-01.pdf]

## Supplemental Information

### Methods and Materials

We conducted a confirmatory region of interest (ROI) analysis for prefrontal and limbic structures, using bilateral DLPFC (BA9/46), amygdala, and parahippocampal cortex as defined by the WFU PickAtlas software (PickAtlas2.4; Wake Forest University, Winston-Salem, North Carolina; <http://fmri.wfubmc.edu/>) (1). Correlations between genotype and mean ROI were calculated for each diagnostic group and then compared between groups using Fisher's Z transformation.

### Results

In repeat analyses excluding the two non-Caucasian patients, results were unchanged, except the left precuneus finding (within schizophrenia group analysis) no longer met the cluster-level correction. In repeat analyses using sex as a nuisance covariate, results were unchanged, except both inferior frontal gyrus findings (within control group and between diagnostic group analyses) no longer met the cluster-level correction.

Region of interest analyses confirmed the reported findings, showing in patients statistically significant relationships between genotype and resting rCBF in the DLPFC ( $R^2=0.19$ ,  $df=23$ ) and amygdala ( $R^2=0.20$ ,  $df=23$ ) and a trend-level relationship in the parahippocampus ( $R^2=0.13$ ,  $df=23$ ). Healthy participants showed no significant relationship between genotype and rCBF in these same regions ( $R^2<0.002$ ,  $df=45$  for all

Eisenberg *et al.*

ROIs). Between-diagnostic-group differences in these correlations were significant ( $p < 0.05$ ) in the DLPFC and amygdala and trend-level ( $p = 0.07$ ) in the parahippocampus.

1. Maldjian JA, Laurienti PJ, Kraft RA, Burdette JH (2003): An automated method for neuroanatomic and cytoarchitectonic atlas-based interrogation of fMRI data sets. *Neuroimage* 19:1233-9.

**Table S1. COMT Genotype-Resting rCBF Relationships in Patients and Healthy Volunteers**

| <b>Parametric Analyses</b>           |                                         |                                          |                                   |                                         |                                          |
|--------------------------------------|-----------------------------------------|------------------------------------------|-----------------------------------|-----------------------------------------|------------------------------------------|
| <b>Patients</b>                      |                                         |                                          | <b>Healthy Volunteers</b>         |                                         |                                          |
| <b>Region</b>                        | <b>Peak Voxel Coordinates (x, y, z)</b> | <b>Association with COMT Met Alleles</b> | <b>Region</b>                     | <b>Peak Voxel Coordinates (x, y, z)</b> | <b>Association with COMT Met Alleles</b> |
| right middle frontal gyrus (BA9/46)  | 26, 44, 32                              | positive*                                | left orbital cortex (BA47)        | -22, 14, -16                            | positive                                 |
| right superior temporal gyrus (BA22) | 56, -48, 16                             | positive*                                | left middle temporal gyrus (BA21) | -66, -30, -12                           | positive                                 |
| precuneus (BA7)                      | -2, -70, 48                             | positive                                 | right cingulate gyrus             | 14, 8, 28                               | negative                                 |
| right amygdala                       | 20, 2, -20                              | negative                                 |                                   |                                         |                                          |
| left para-hippocampal gyrus (BA28)   | -16, 2, -32                             | negative*                                |                                   |                                         |                                          |

  

| <b>Regions of Interest Analyses</b>               |                           |                                          |                                                   |                           |                                          |
|---------------------------------------------------|---------------------------|------------------------------------------|---------------------------------------------------|---------------------------|------------------------------------------|
| <b>Patients</b>                                   |                           |                                          | <b>Healthy Volunteers</b>                         |                           |                                          |
| <b>Region</b>                                     | <b>R<sup>2</sup> (df)</b> | <b>Association with COMT Met Alleles</b> | <b>Region</b>                                     | <b>R<sup>2</sup> (df)</b> | <b>Association with COMT Met Alleles</b> |
| bilateral dorsolateral prefrontal cortex (BA9/46) | 0.19(23)                  | positive*                                | bilateral dorsolateral prefrontal cortex (BA9/46) | <0.001(45)                | -                                        |
| bilateral amygdala                                | 0.20(23)                  | negative*                                | bilateral amygdala                                | 0.002(45)                 | -                                        |
| bilateral para-hippocampus                        | 0.13(23)                  | negative                                 | bilateral para-hippocampus                        | <0.001(45)                | -                                        |

\*statistically significant between-diagnostic-group difference
